# Supplementary material for: Predicting Dose-Range Chemical Toxicity using Novel Hybrid Deep Machine-Learning Method
Source: MDPI journal article supplement (doi:10.3390/toxics10110706), 2022-11-18
Supplement: s1 [file s1]

## Supplementary Materials

**Equation (S1).** Equation to calculate the ensemble probability derived by Mayr et al<sup>13</sup>.

$$\frac{\prod_{i=1}^n p(t = 1 | y_i)}{\prod_{i=1}^n p(t = 1 | y_i) + \prod_{i=1}^n p(t = 0 | y_i)}$$

Where,  $n$  is the number of models,  $y_i$  is the prediction score by the model  $i$ ,  $p(t = 1 | y_i)$  is the predicted probability for class 1 and  $p(t = 0 | y_i)$  is the predicted probability for class 0.

**Equation (S2).** Equations to calculate the evaluation metrics.

$$Accuracy = \frac{TP + TN}{TP + TN + FN + FP} \times 100$$

$$Sensitivity(truepositiverate) = \frac{TP}{TP + FN} \times 100$$

$$Specificity(truenegativerate) = \frac{TN}{TN + FP} \times 100$$

$$Precision = \frac{TP}{TP + FP} \times 100$$

Where, TP = True Positive, TN = True Negative, FP = False Positive, and FN = False Negative.

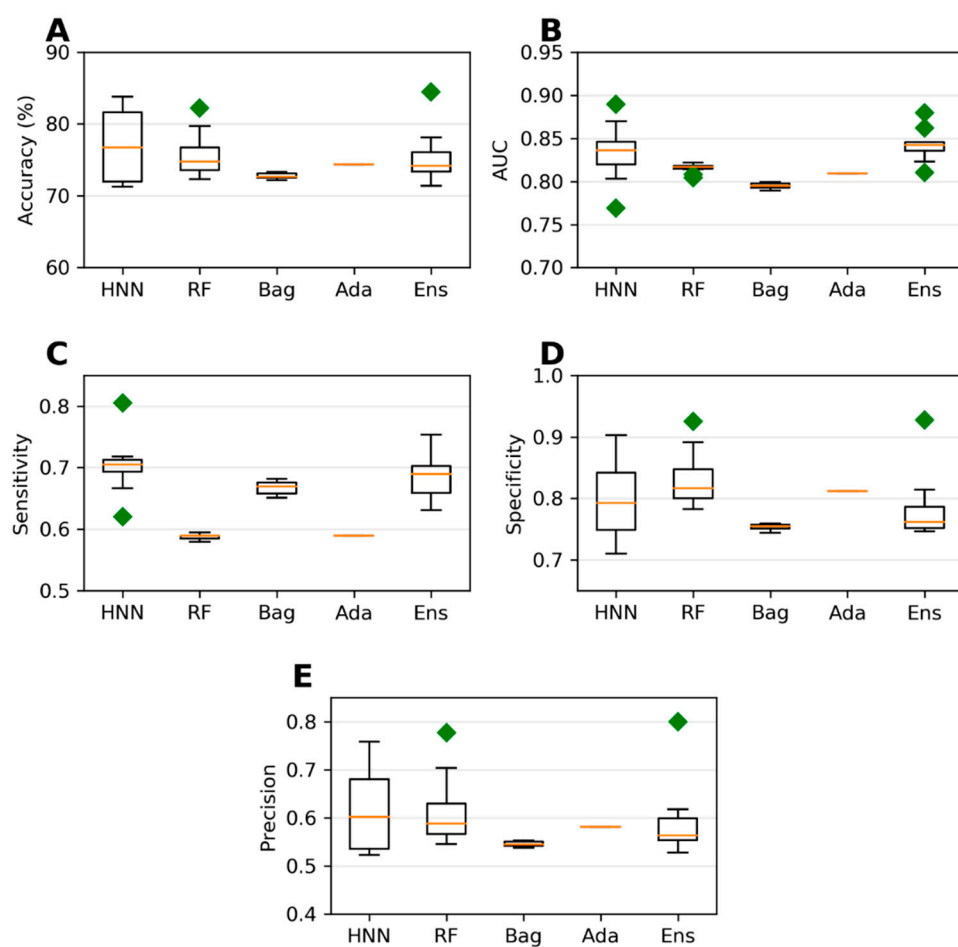

**Figure S1.** (A) Accuracy, (B) AUC, (C) Sensitivity, (D) Specificity and (E) Precision for the T3DB external validation dataset predicted by HNN-Tox, RF, Bagging, AdaBoost and the Ensemble methods to validate the models built on the ChemIDplus Oral data.

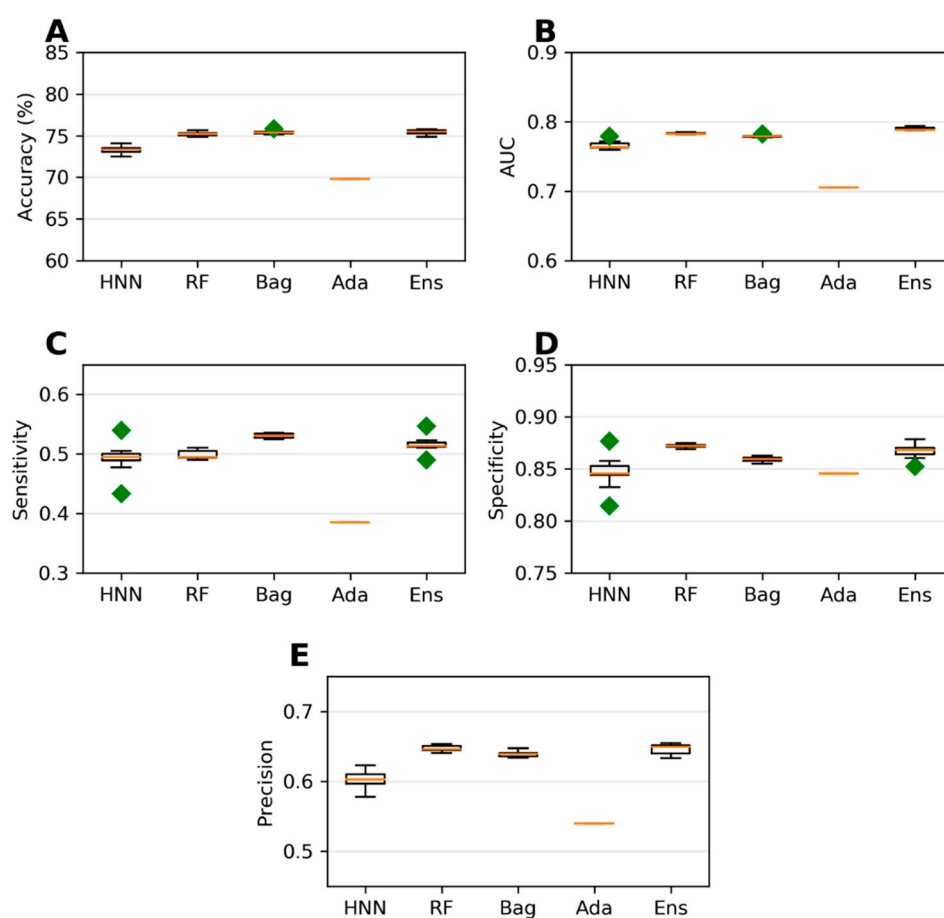

**Figure S2.** (A) Accuracy, (B) AUC, (C) Sensitivity, (D) Specificity and (E) Precision for the external validation dataset obtained from NTP, predicted by the HNN-Tox, RF, Bagging, AdaBoost and the Ensemble methods to validate the models built on ChemIDplus Oral data.

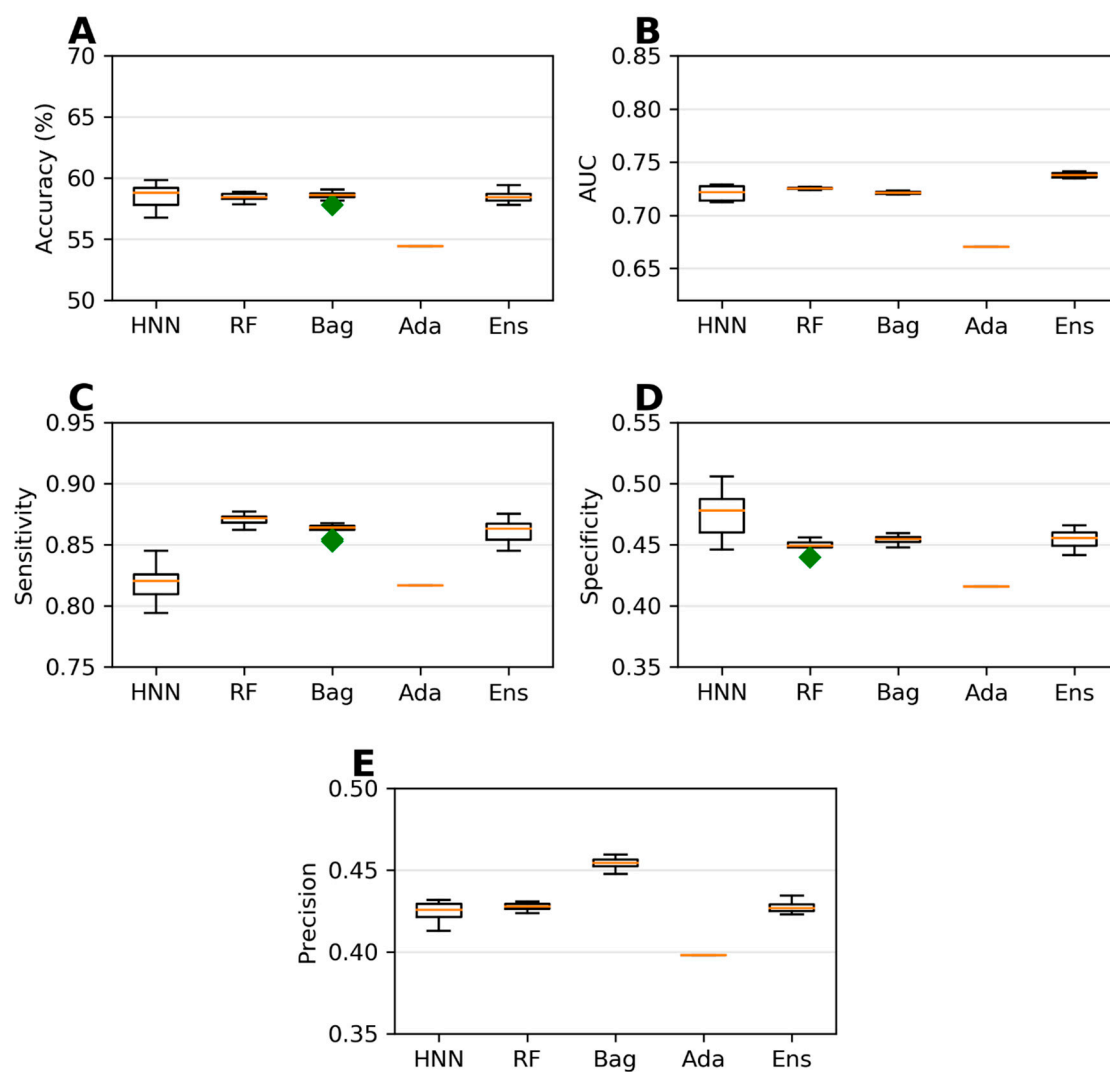

**Figure S3.** (A) Accuracy, (B) AUC, (C) Sensitivity, (D) Specificity and (E) Precision for the NTP external validation dataset predicted by the HNN-Tox, RF, Bagging, AdaBoost and the Ensemble methods to validate the models built on ChemIDplus IP/IV/Sub/Oral data.

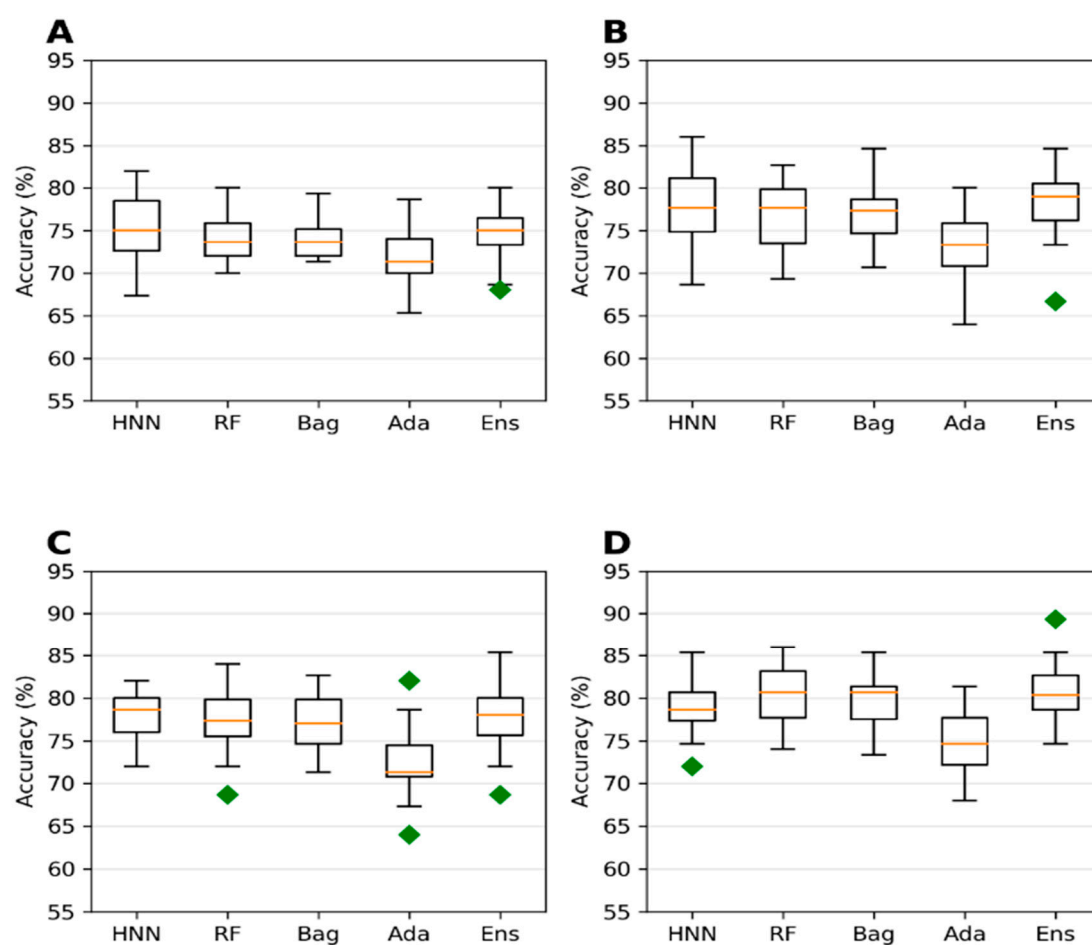

**Figure S4.** Accuracy of the Toxins data with IP, IV, Subcutaneous and Oral route of exposure with various LD<sub>50</sub> cutoff (A) 250 mg/kg, (B) 500 mg/kg, (C) 750 mg/kg and (D) 1000 mg/kg predicted by the HNN-Tox, RF, Bagging, AdaBoost and the Ensemble methods.

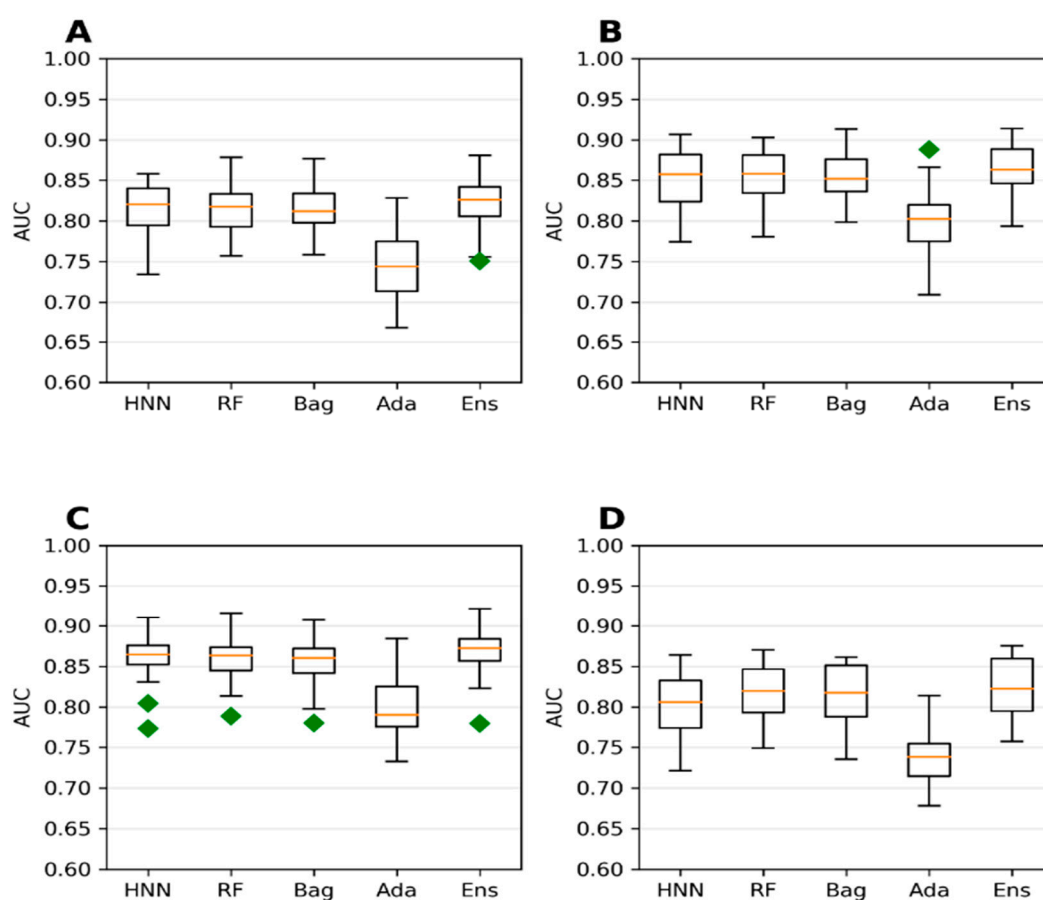

**Figure S5.** AUC for Toxins data obtained with IP, IV, Subcutaneous and Oral route of exposure with various LD<sub>50</sub> cutoff (A) 250 mg/kg, (B) 500 mg/kg, (C) 750 mg/kg and (D) 1000 mg/kg predicted by the HNN-Tox, RF, Bagging, AdaBoost and the Ensemble methods.

**Table S1.** T3DB Toxins data annotated with different LD<sub>50</sub> threshold values.

| <i>LD<sub>50</sub> threshold<br/>(mg/kg)</i> | <i>T3DB Toxins data</i>               |                 |
|----------------------------------------------|---------------------------------------|-----------------|
|                                              | <i>62 descriptors (778 chemicals)</i> |                 |
|                                              | <i>Toxic</i>                          | <i>Nontoxic</i> |
| < 1000                                       | 632                                   | 146             |
| < 750                                        | 404                                   | 374             |
| < 500                                        | 363                                   | 415             |
| < 250                                        | 285                                   | 493             |

**Table S2.** T3DB Toxins IP/IV/Subcutaneous/Oral route of exposure data annotated with different LD<sub>50</sub> threshold values.

| <i>LD<sub>50</sub></i><br><i>threshold</i><br><i>(mg/kg)</i> | <i>Oral</i>                           |                 | <i>IP, IV, Subcutaneous</i>           |                 |
|--------------------------------------------------------------|---------------------------------------|-----------------|---------------------------------------|-----------------|
|                                                              | <i>62 descriptors (687 chemicals)</i> |                 | <i>62 descriptors (752 chemicals)</i> |                 |
|                                                              | <i>Toxic</i>                          | <i>Nontoxic</i> | <i>Toxic</i>                          | <i>Nontoxic</i> |
| <i>&lt; 1000</i>                                             | 285                                   | 402             | 573                                   | 179             |
| <i>&lt; 750</i>                                              | 262                                   | 425             | 345                                   | 407             |
| <i>&lt; 500</i>                                              | 225                                   | 462             | 307                                   | 445             |
| <i>&lt; 250</i>                                              | 157                                   | 530             | 238                                   | 514             |

**Table S3.** Animal toxicity data from the EPA annotated with different LD<sub>50</sub> threshold values.

| <i>LD<sub>50</sub> threshold<br/>(mg/kg)</i> | <i>EPA's Animal toxicity data</i>     |                 |
|----------------------------------------------|---------------------------------------|-----------------|
|                                              | <i>62 descriptors (427 chemicals)</i> |                 |
|                                              | <i>Toxic</i>                          | <i>Nontoxic</i> |
| < 1000                                       | 418                                   | 9               |
| < 750                                        | 418                                   | 9               |
| < 500                                        | 412                                   | 15              |
| < 250                                        | 404                                   | 23              |

**Table S4.** Combined data after merging animal toxicity data from the EPA (Table S1) and toxins data from the T3DB (Table S3) annotated with different LD<sub>50</sub> threshold values.

| <i>LD<sub>50</sub> threshold<br/>(mg/kg)</i> | <i>EPA's Animal Toxicity data + T3DB data</i> |                 |
|----------------------------------------------|-----------------------------------------------|-----------------|
|                                              | <i>62 descriptors (1054 chemicals)</i>        |                 |
|                                              | <i>Toxic</i>                                  | <i>Nontoxic</i> |
| < 1000                                       | 941                                           | 113             |
| < 750                                        | 720                                           | 334             |
| < 500                                        | 687                                           | 367             |
| < 250                                        | 623                                           | 431             |

**Table S5.** Distribution of Toxins Oral data among four classes in the multiclass classification.

| <i>LD<sub>50</sub> Threshold (mg/kg)</i> | <i>Class</i> | <i>No. of Chemicals</i> |
|------------------------------------------|--------------|-------------------------|
| <i>LD<sub>50</sub> &lt; 50</i>           | 3            | 68                      |
| <i>50 ≤ LD<sub>50</sub> &lt; 500</i>     | 2            | 157                     |
| <i>500 ≤ LD<sub>50</sub> &lt; 1000</i>   | 1            | 60                      |
| <i>LD<sub>50</sub> ≥ 1000</i>            | 0            | 402                     |
